# Supplementary material for: Validation of Ten Noninvasive Diagnostic Models for Prediction of Liver Fibrosis in Patients with Chronic Hepatitis B
Source: PLOS journal article supplement (doi:10.1371/journal.pone.0144425), 2015-12-28
Supplement: S1 (10.1371/journal.pone.0144425.s001) [file journal.pone.0144425.s001]

北京友谊医院国家药品临床研究基地  
伦理委员会设备、仪器临床试验审批表

(2007) 设备、仪器临审第 26 号

|            |                                |      |         |                                                                                       |           |
|------------|--------------------------------|------|---------|---------------------------------------------------------------------------------------|-----------|
| 实验项目名称     | FIBROSCAN 无创评价慢性乙型肝炎肝纤维化及肝硬化程度 |      |         |                                                                                       |           |
| 试验目的       | 临床验证                           |      |         | 例数                                                                                    | 100 例     |
| 申请科室       | 肝病中心                           | 承担责任 | 组织 参与 √ | 项目负责人                                                                                 | 贾继东       |
| 医学伦理委员会成员: |                                |      |         |                                                                                       |           |
| 姓 名        | 职 务                            | 同意   | 不同意     | 签名                                                                                    | 日期        |
| 魏 玫        | 主任委员                           | ①    |         |   | 2007.12.5 |
| 刘 建        | 副主任委员                          | ①    |         |  | 2007.12.5 |
| 王汝龙        | 副主任委员                          | ①    |         |  | 2007.12.5 |
| 韩小茜        | 委员                             | ①    |         |  | 2007.12.5 |
| 王 宇        | 委员                             | ①    |         |  | 2007.12.5 |
| 王质刚        | 委员                             | ①    |         |  | 2007.12.5 |
| 沈潞华        | 委员                             | ①    |         |  | 2007.12.5 |
| 张淑文        | 委员                             | ①    |         |  | 2007.12.5 |
| 冯 捷        | 委员                             | ①    |         |  | 2007.12.5 |
| 蔡 真        | 委员                             | ①    |         |  | 07.12.5   |

审批意见: ☒ ① 同意; ② 作必要的修改后同意; ③ 不同意; ④ 终止或暂停已批准的试验。

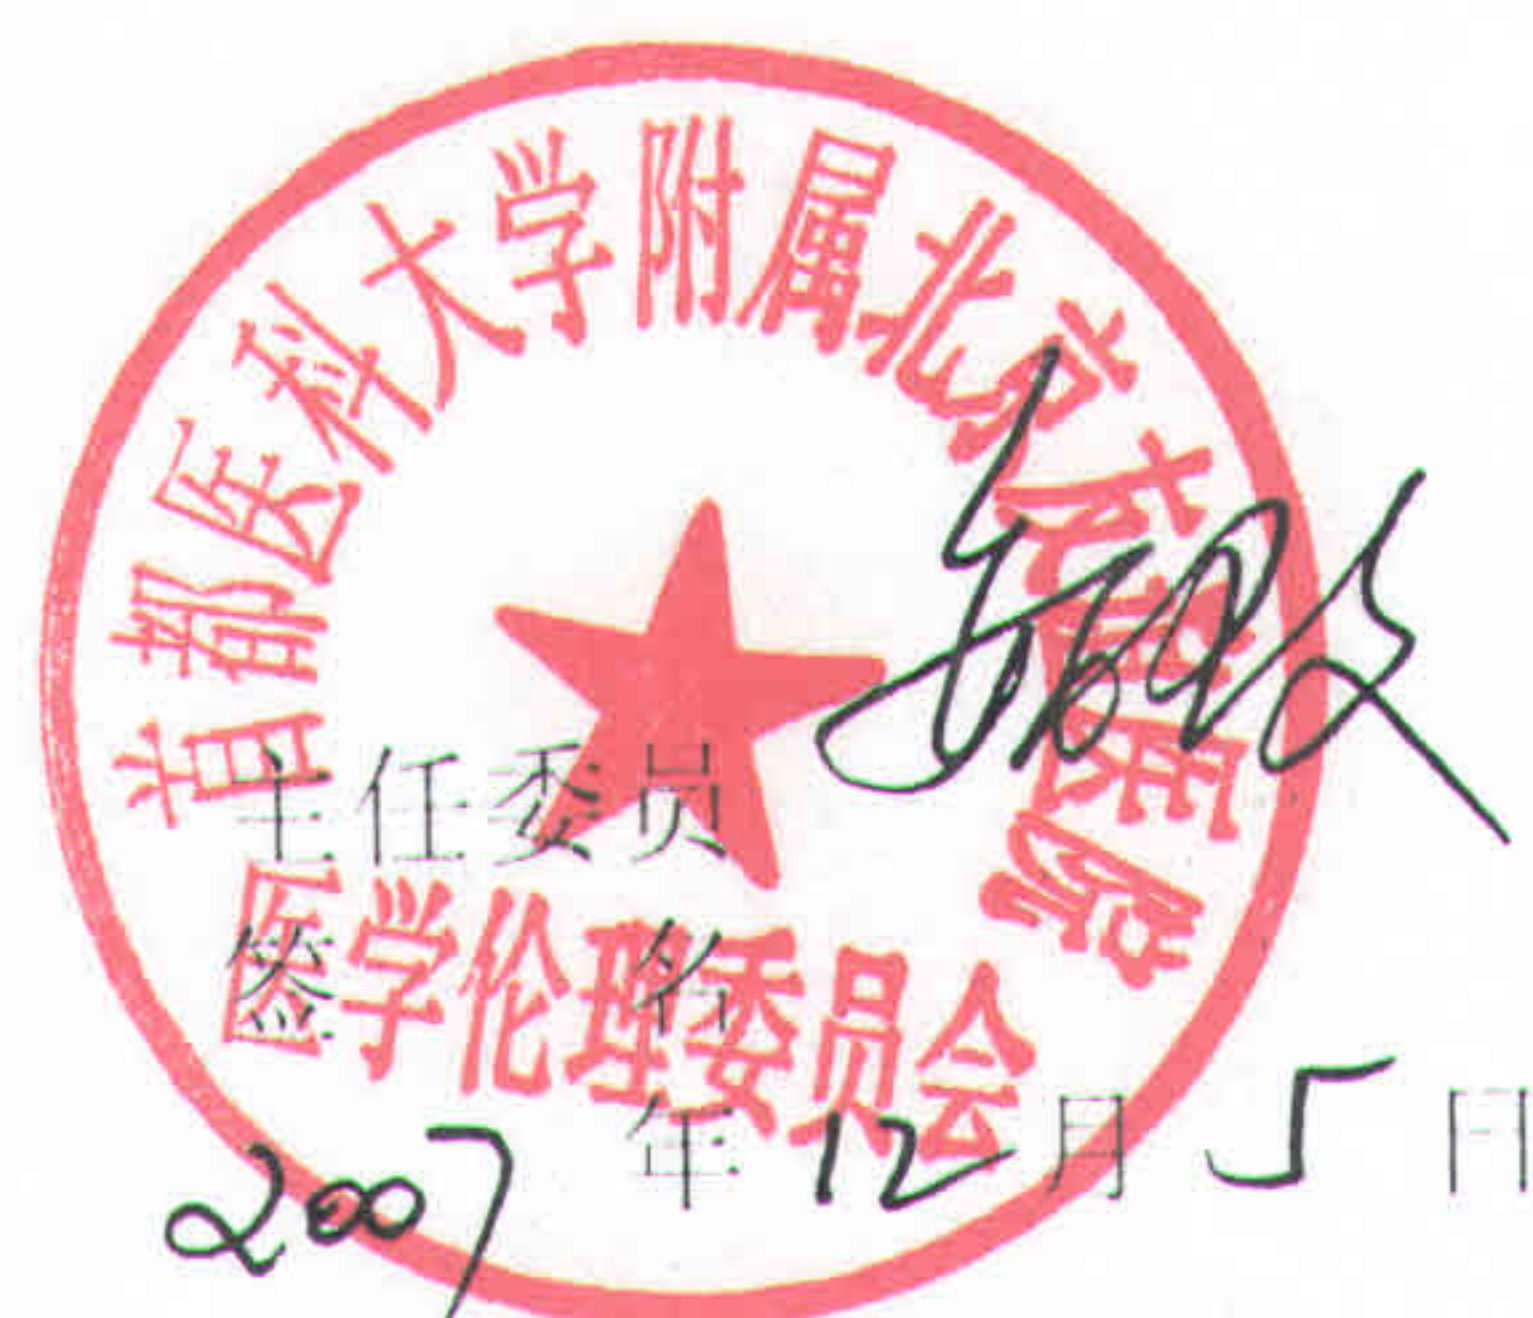

声明: 参加审批的伦理委员会独立于医院和中办者, 并且本伦理委员会严格按照中国 GCP 及相关法规组成和工作。

伦理委员会地址: 北京市宣武区永安路 95 号 (邮编: 100050)



# 北京友谊医院伦理委员会

## 关于设备、仪器临床试验伦理要求

(2007) 设备、仪器临审第 26 号

|        |                                                                      |        |          |       |       |
|--------|----------------------------------------------------------------------|--------|----------|-------|-------|
| 试验项目名称 | FIBROSCAN 无创评价慢性乙型肝炎肝纤维化及肝硬化程度                                       |        |          |       |       |
| 试验目的   | 临床验证                                                                 |        |          | 例数    | 100 例 |
| 申请科室   | 肝病中心                                                                 | 承担责任   | 参与       | 项目负责人 | 贾继东   |
| 研制单位   | 法国 ECHOSENS 公司                                                       |        |          |       |       |
| 试验申办者  | 中国肝炎防治基金会王宝恩肝纤维化基金                                                   |        |          |       |       |
| 报送材料   | 政府部门批件                                                               | 无需政府批件 | 审查<br>意见 | 研究者资格 | 符合要求  |
|        | 检验报告                                                                 | 有      |          | 试验方案  | 适当    |
| 受试对象   | 慢性乙型肝炎肝纤维化及早期肝硬化患者                                                   |        |          |       |       |
| 适应症或功能 | 慢性乙型肝炎肝纤维化及肝硬化                                                       |        |          |       |       |
| 临床评价标准 | 按照统计学标准进行操作                                                          |        |          |       |       |
| 安全性及风险 | 可能发生的副作用：无<br>可能发生的器械不良反应：无<br>有损伤检查项目及次数：无<br>国内外是否用于人体试验：国外已用于临床检查 |        |          |       |       |
| 知情情况   | 签署知情同意书                                                              |        |          |       |       |
| 被试验者受益 | 和本研究有关的检查和化验免费，并提供患者交通补贴。                                            |        |          |       |       |
| 其它     |                                                                      |        |          |       |       |
