# Supplementary material for: Validation of Ten Noninvasive Diagnostic Models for Prediction of Liver Fibrosis in Patients with Chronic Hepatitis B
Source: PLOS journal article supplement (doi:10.1371/journal.pone.0144425), 2015-12-28
Supplement: S1 (10.1371/journal.pone.0144425.s001) [file journal.pone.0144425.s001]

# 上海交通大学医学院附属仁济医院伦理委员会

## 临床药物试验审批件

仁济伦审[ 2007 ] 56 号

|                                 |                                                                                                                                                                                                                                                                                                                                                                                                                                              |       |      |        |       |
|---------------------------------|----------------------------------------------------------------------------------------------------------------------------------------------------------------------------------------------------------------------------------------------------------------------------------------------------------------------------------------------------------------------------------------------------------------------------------------------|-------|------|--------|-------|
| 试验项目名称                          | FIBROSCAN 无创评价慢性肝炎肝纤维化及肝硬化程度研究方案                                                                                                                                                                                                                                                                                                                                                                                                             |       |      |        |       |
| 药物名称                            | FIBROSCAN<br>超声诊断仪                                                                                                                                                                                                                                                                                                                                                                                                                           | 剂型    | 医疗器械 | SFDA 号 |       |
| 申办单位                            | 中国肝炎防治基金会                                                                                                                                                                                                                                                                                                                                                                                                                                    |       |      |        |       |
| 临床试验科室<br>(专业)                  | 消化科                                                                                                                                                                                                                                                                                                                                                                                                                                          | 项目负责人 | 曾民德  | 职称     | 主任医师  |
|                                 |                                                                                                                                                                                                                                                                                                                                                                                                                                              | 主要参加者 | 茅益民  | 职称     | 副主任医师 |
| 其他参加单位                          | 首都医科大学附属北京友谊医院 中国人民解放军第 302 医院<br>首都医科大学附属北京佑安医院 上海交通大学医学院附属仁济医院<br>第三军医大学附属重庆市西南医院 南方医科大学南方医院                                                                                                                                                                                                                                                                                                                                               |       |      |        |       |
| 报<br>送<br>材<br>料                | <input type="checkbox"/> 国家食品药品监督管理局批号：无<br><input type="checkbox"/> 药品检验报告：国家食品药品监督管理局武汉医疗器械质量监督检验中心 2007220<br><input type="checkbox"/> 院外伦理审查批件： 无<br><input type="checkbox"/> 临床试验方案及日期：2007 年 8 月<br><input type="checkbox"/> 知情同意书及日期： 有<br><input type="checkbox"/> 研究者手册：2007 年 8 月<br><input type="checkbox"/> 参考文献或其他：委托书、研究者简历、用户手册、产品标准、CRF                                                                                      |       |      |        |       |
| 伦<br>理<br>委<br>员<br>会<br>意<br>见 | 审查结果：<br>(1) 同意临床试验 <input checked="" type="checkbox"/> (2) 作必要的修改后同意 <input type="checkbox"/><br>(3) 不同意临床试验 <input type="checkbox"/> (4) 终止或暂停已批准的试验 <input type="checkbox"/><br>(5) 作必要修改后再审批 <input type="checkbox"/><br>审查意见：<br><br><div style="text-align: right;">             伦理委员会主任（签名）： <br/>             2007 年 10 月 26 日           </div> |       |      |        |       |

## 上海交通大学医学院附属仁济医院

## 伦理委员会出席成员名单

仁济伦审[2007] 56 号

| 姓名                                                                                      | 性别 | 职务        | 工作部门/职称     | 同意 | 不同意 | 签名    |
|-----------------------------------------------------------------------------------------|----|-----------|-------------|----|-----|-------|
| 范关荣                                                                                     | 男  | 主任        | 仁济医院院部、教授   | 同意 |     | 范关荣   |
| 李卫平                                                                                     | 男  | 委员        | 仁济医院外科、教授   | 同意 |     | 李卫平   |
| 陆惠华                                                                                     | 女  | 委员        | 仁济医院内科、教授   | 同意 |     | 陆惠华   |
| 钱家麒                                                                                     | 男  | 委员        | 仁济医院内科、教授   | 同意 |     | 钱家麒   |
| 张滨                                                                                      | 男  | 委员        | 康昕律师所, 律师   | 同意 |     | 张滨    |
| 孔宪明                                                                                     | 男  | 委员        | 仁济医院科研部、教授  | 同意 |     | 孔宪明   |
| 王育                                                                                      | 女  | 委员兼<br>秘书 | 仁济医院政工部、副教授 | 同意 |     | 王育    |
| 表决结果                                                                                    |    |           |             |    |     |       |
| 投票人数                                                                                    | 7  | 同意        | 7           | 反对 | 0   | 弃权或回避 |
| <p>经医院伦理委员会的审阅和讨论, 伦理委员会认为该项目符合医学伦理学原则和《药物临床试验管理规范》, 请按照批准的研究方案进行临床试验, 并定期提供研究进展报告。</p> |    |           |             |    |     |       |

记录: 王育

审批时间: 2007 年 10 月 26 日

地址: 上海市东方路 1630 号 (200127). 电话: (021) 58752345-3417. 传真: (021) 58393018
