# Supplementary material for: Validation of Ten Noninvasive Diagnostic Models for Prediction of Liver Fibrosis in Patients with Chronic Hepatitis B
Source: PLOS journal article supplement (doi:10.1371/journal.pone.0144425), 2015-12-28
Supplement: S1 (10.1371/journal.pone.0144425.s001) [file journal.pone.0144425.s001]

# 解放军第三〇二医院医学伦理委员会药物临床试验审批件

编号：医伦[2007]第 013 号

|                                                                                           |                                            |                                            |                                              |
|-------------------------------------------------------------------------------------------|--------------------------------------------|--------------------------------------------|----------------------------------------------|
| 药物临床试验<br>项目名称                                                                            | FIBROSCAN 无创评价慢性乙型肝炎肝纤维化及肝硬化程度<br>临床研究     |                                            |                                              |
| 试验药物名称                                                                                    | 中文名                                        | —                                          |                                              |
|                                                                                           | 英文名                                        | —                                          |                                              |
| 药物类别                                                                                      | —                                          | SFDA 批件号                                   | —                                            |
| 申办者                                                                                       | 解放军第三〇二医院                                  |                                            |                                              |
| CRO                                                                                       | —                                          |                                            |                                              |
| 临床试验专业                                                                                    | 感染七科、病理科                                   | 项目负责人                                      | 陈菊梅                                          |
| 审阅文件                                                                                      | 临床研究批件 <input checked="" type="checkbox"/> | 临床试验方案 <input checked="" type="checkbox"/> | 研究者手册 <input checked="" type="checkbox"/>    |
|                                                                                           | 知情同意书 <input checked="" type="checkbox"/>  | 药检报告 <input checked="" type="checkbox"/>   | 研究者组成及简历 <input checked="" type="checkbox"/> |
| 医学伦理委员会审批意见                                                                               |                                            |                                            |                                              |
| 同意 <input checked="" type="checkbox"/>                                                    |                                            | 作必要的修正后同意 <input type="checkbox"/>         |                                              |
| 不同意 <input type="checkbox"/>                                                              |                                            | 终止或暂停已批准的试验 <input type="checkbox"/>       |                                              |
| 医学伦理委员会审批说明                                                                               |                                            |                                            |                                              |
| <p>本临床研究方案设计合理，同意开展此项临床研究，同时在试验中应充分做到知情同意，并注意受试者不良事件（尤其是肝穿相关不良事件）的发生，及时处理，保护受试者身体健康。</p>  |                                            |                                            |                                              |
| <p style="text-align: right;">主任委员：陈菊梅</p> <p style="text-align: right;">07年 9 月 13 日</p> |                                            |                                            |                                              |
